# Supplementary material
Source: PubMed Central journal article supplement (PMC7469628)
Supplement: KCCY_A_1792686_SM4436.pdf [file KCCY_A_1792686_SM4436.pdf]

## RPMI 8226 cell

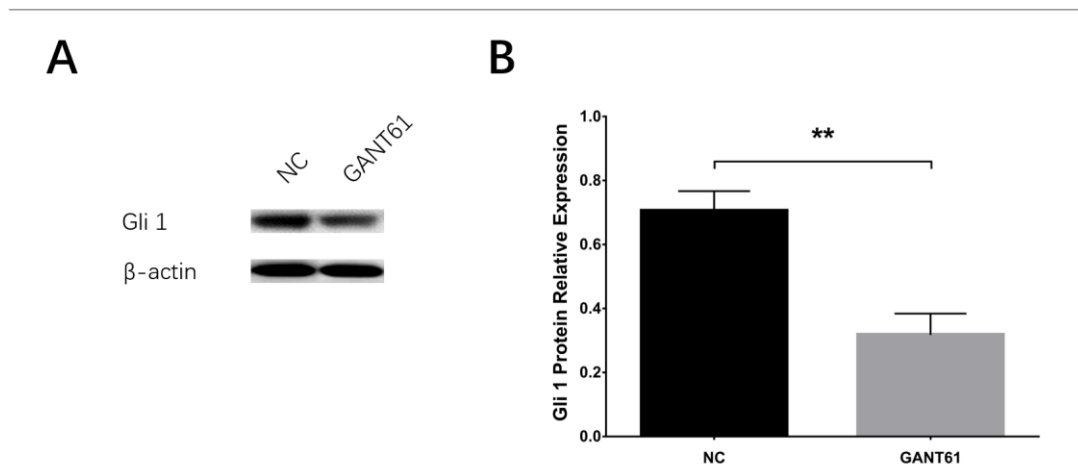

## U266 cell

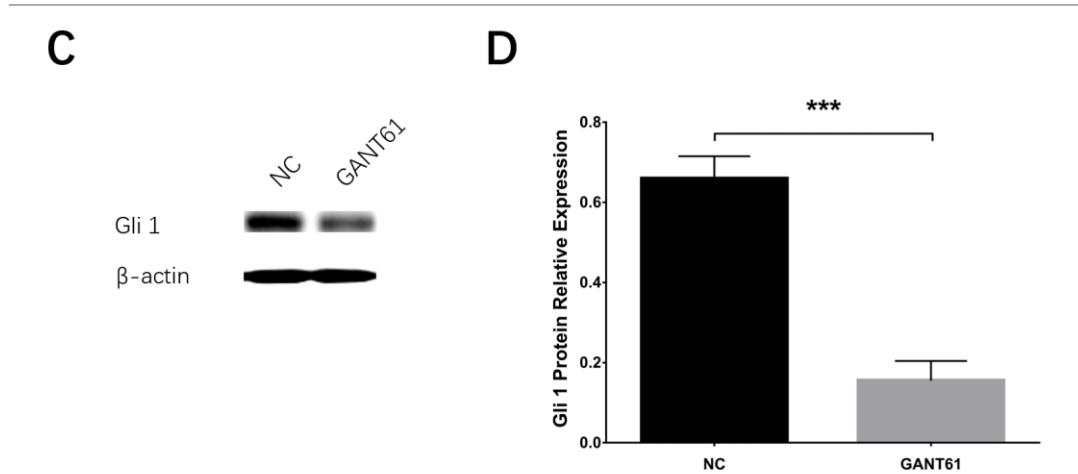

**Supplementary Figure 1.** Influence of GANT61 on Gli 1 expression in MM cells. Gli 1 protein expression was decreased in GANT61 group compared to NC group in both RPMI 8226 cells (A, B) and U266 cells (C, D). \*\*,  $P < 0.01$ ; \*\*\*,  $P < 0.001$ ; MM, multiple myeloma.
